# Supplementary material for: Globally prevalent PfMDR1 mutations modulate Plasmodium falciparum susceptibility to artemisinin-based combination therapies
Source: PubMed Central journal article supplement (PMC4873939; doi:10.1038/ncomms11553), 2016-05-18
Supplement: ncomms11553-s1.pdf [file ncomms11553-s1.pdf]

## Supplementary Information

### Globally prevalent PfMDR1 mutations modulate *Plasmodium falciparum* susceptibility to artemisinin-based combination therapies

M. Isabel Veiga, Satish K. Dhingra, Philipp P. Henrich, Judith Straimer, Nina Gnadig, Anne-Catrin Uhlemann, Rowena E. Martin, Adele M. Lehane, David A. Fidock

**Supplementary Figure 1** | Atovaquone *in vitro* IC<sub>50</sub> data with *pfmdr1*-modified and parental lines.

**Supplementary Figure 2** | Ring-stage and Trophozoite-stage survival assays of *pfmdr1*-modified and parental NF10 lines.

**Supplementary Figure 3** | *In vitro* drug accumulation profiles of *pfmdr1*-modified clones in the NF10 background and the recombinant control.

**Supplementary Figure 4** | Allelic exchange strategy employed to introduce F1226Y into PfMDR1.

**Supplementary Table 1** | Prevalence of PfMDR1 haplotypes at positions 86/184 and copy number variations and PfCRT residue 76 status in sampled malaria-endemic countries.

**Supplementary Table 2** | Copy number analysis of *pfmdr1*-modified recombinant lines.

**Supplementary Table 3** | Mean±SEM IC<sub>50</sub> values (nM) of NF10 parental strain and *pfmdr1*-modified recombinant lines.

**Supplementary Table 4** | Mean±SEM IC<sub>50</sub> values (nM) of KC5 parental strain and *pfmdr1*-modified recombinant lines.

**Supplementary Table 5** | Mean±SEM IC<sub>90</sub> values (nM) of NF10 parental strain and *pfmdr1*-modified recombinant lines.

**Supplementary Table 6** | Mean±SEM IC<sub>90</sub> values (nM) of KC5 parental strain and *pfmdr1*-modified recombinant lines.

**Supplementary Table 7** | Mean±SEM IC<sub>50</sub> values of K1 parental strain and PfMDR1 F1226Y recombinant lines.

**Supplementary Table 8** | List of oligonucleotides used in this study.

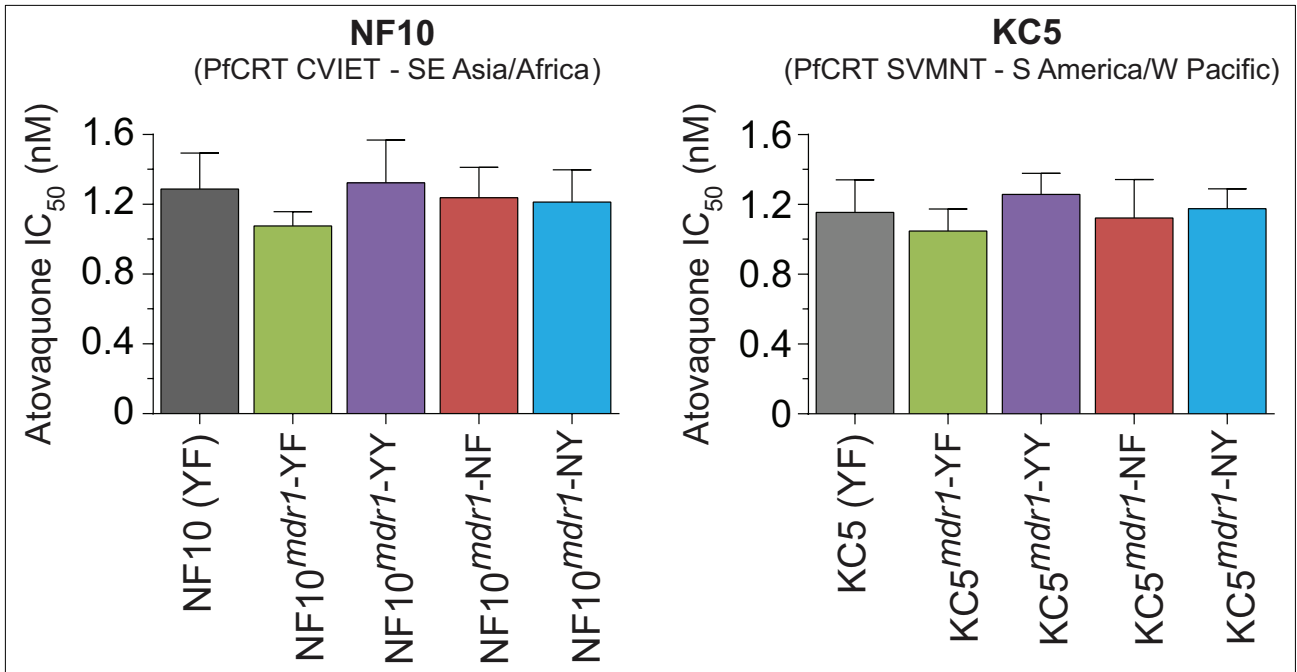

**Supplementary Figure 1 | Atovaquone *in vitro* IC<sub>50</sub> data with *pfmdr1*-modified and parental lines.** Experiments were performed in duplicate on 5–7 independent occasions and IC<sub>50</sub> values as presented as mean±SEM. No significant differences were observed between any *pfmdr1*-modified lines and their parental controls.

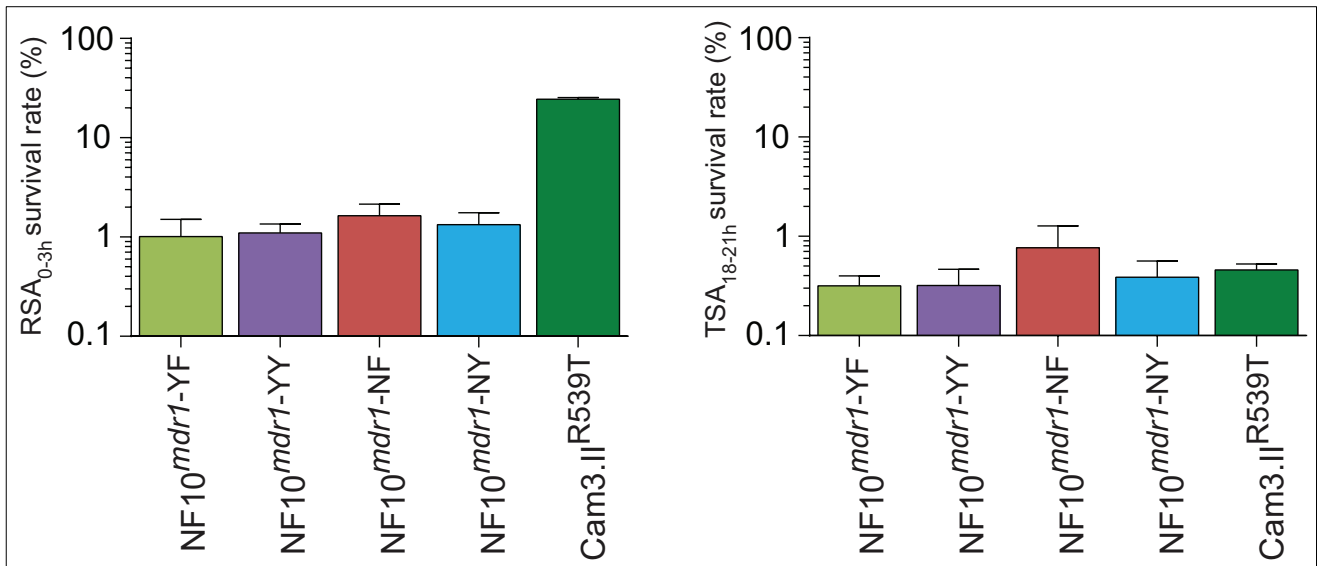

**Supplementary Figure 2 | Ring-stage and Trophozoite-stage survival assays of *pfmdr1*-modified and parental NF10 lines.** Data were generated using ring-stage and trophozoite-stage survival assays, prepared with synchronized parasites beginning 0-3 hr and 18-21 hr post-invasion (the RSA<sub>0-3h</sub> and TSA<sub>18-21h</sub>) respectively. Parasites were exposed to 700 nM dihydroartemisinin for 6 hr, the drug removed by washing, and survival measured after 66 hr of further culture. The parasitemia of surviving parasites was determined by flow cytometry of 20,000–35,000 parasites stained with SYBR Green I and Mitotracker Deep Red. Assays were performed in duplicate on three separate occasions. Survival values (calculated for each line and assay as a percent survival of DMSO-control treated parasites from that same line) are shown as means ± SEM. Mann-Whitney *U* tests showed no significant difference between *pfmdr1*-modified lines and the parental NF10 control. As a positive control for the RSA<sub>0-3h</sub>, we included the Cam3.II<sup>R539T</sup> line, which expresses the K13 R539T mutation that confers *in vitro* ring-stage resistance to dihydroartemisinin.

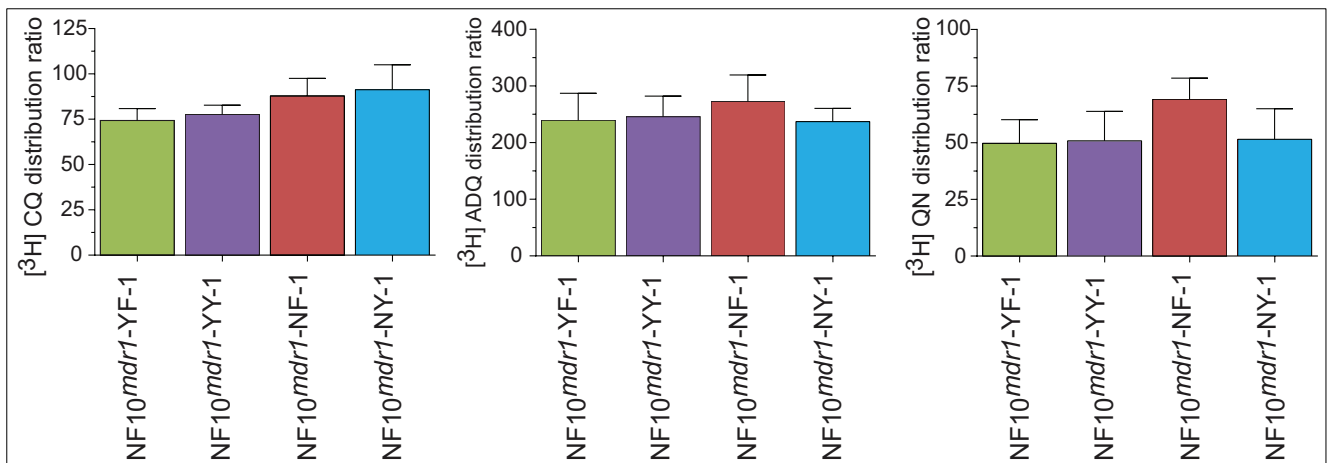

**Supplementary Figure 3 | *In vitro* drug accumulation profiles of *pfmdr1*-modified clones in the NF10 background and the recombinant control.** Accumulation of [<sup>3</sup>H] CQ (tested at a concentration of 20 nM), [<sup>3</sup>H] ADQ (40 nM), or [<sup>3</sup>H] QN (20 nM) by erythrocytes infected with mature trophozoite-stage parasites. Data are shown for *pfmdr1*-modified lines generated in the NF10 background (clones analyzed: NF10<sup>mdr1</sup>-YF-1, NF10<sup>mdr1</sup>-YY-1, NF10<sup>mdr1</sup>-NF-1 and NF10<sup>mdr1</sup>-NY-1). [<sup>3</sup>H]-labeled drug accumulation was measured over 1 hr at 37°C and was expressed as the ‘distribution ratio’, where the distribution ratio corresponds to the concentration of radiolabeled drug within the infected cells relative to the concentration in the extracellular medium. The data shown are mean + SEM of 4 independent experiments for QN and of 5 independent experiments for CQ and ADQ.

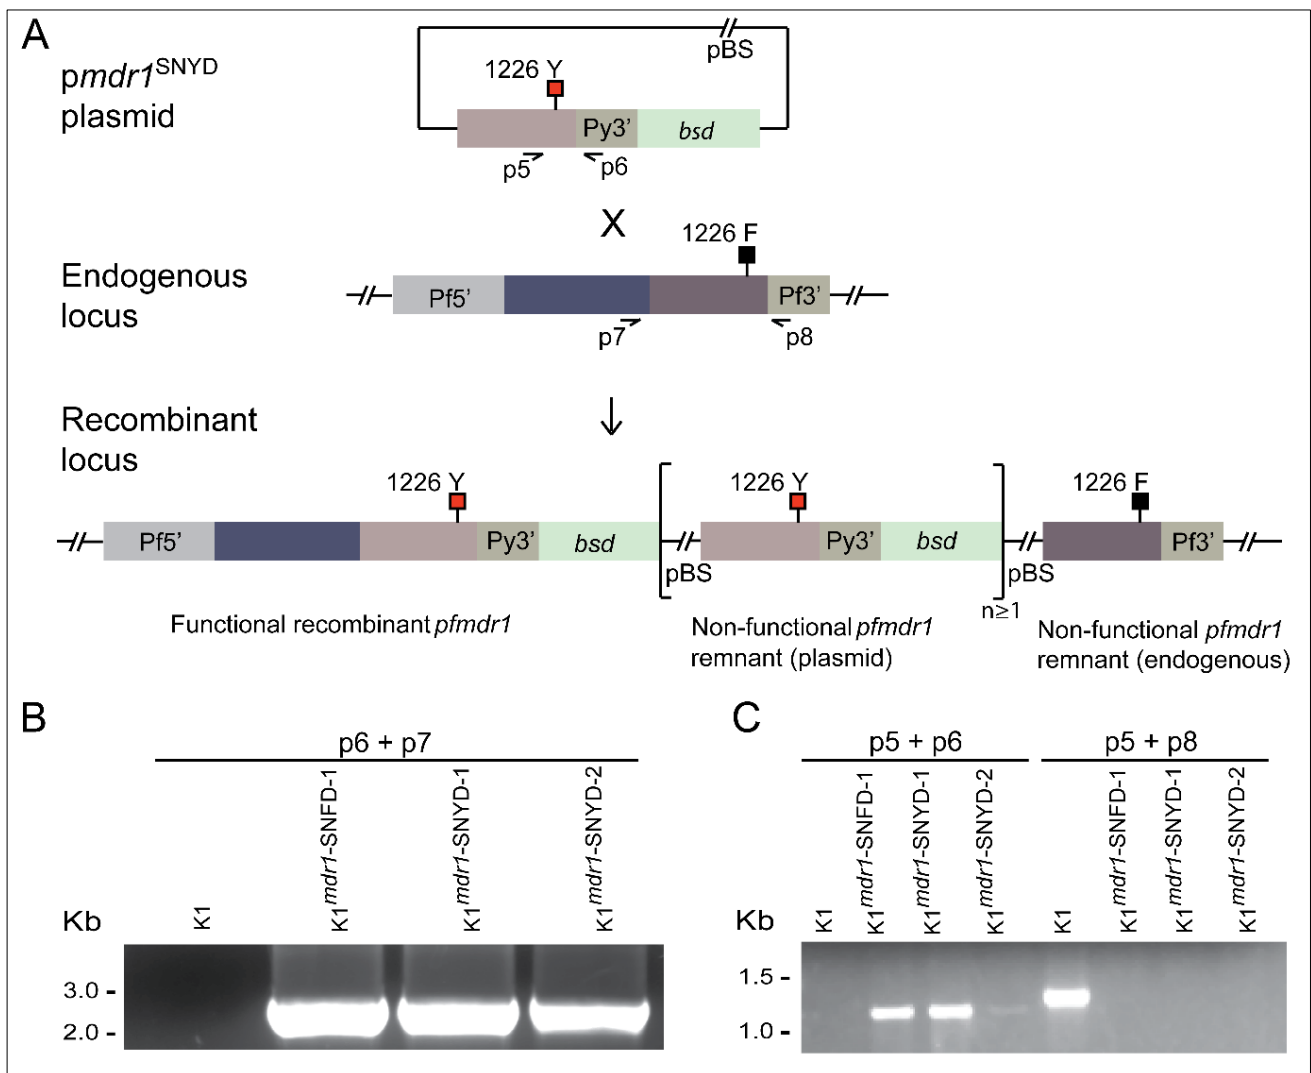

**Supplementary Figure 4 | Allelic exchange strategy employed to introduce F1226Y into PfMDR1. (A)**  $pmdr1^{SNYD}$  contains the last 2.1 kb of  $pfmdr1$  coding sequence, followed by a 0.7 kb fragment of the *P. yoelii*  $mdr1$  3' UTR, and a blasticidin selectable marker (*bsd*). The  $pfmdr1$  sequence within the plasmid was modified by site-directed mutagenesis of the  $pmdr1^{SNFD}$  plasmid<sup>24</sup> using primers p15 and p16 to introduce the mutation encoding 1226Y. The endogenous K1  $pfmdr1$  locus is flanked by *P. falciparum* 3' and 5' UTR elements and carries the wild-type F1226 allele. K1 parasites were transfected with  $pmdr1^{SNYD}$  to introduce the F1226Y mutation or with  $pmdr1^{SNFD}$  to obtain a recombinant control with an unchanged  $pfmdr1$  allele. Transfected parasites were selected with 1.25–2.0  $\mu\text{g/ml}$  blasticidin. Integration of  $pmdr1^{SNYD}$  (or  $pmdr1^{SNFD}$ ) into the endogenous  $pfmdr1$  locus, via single-site cross-over and homologous recombination, resulted in a recombinant locus that contained the functional recombinant  $pfmdr1$  locus and downstream non-functional  $pfmdr1$  remnants. The recombinant parasites were cloned by limiting dilution. **(B)** PCR-based screening of the edited clones  $K1^{mdr1-SNYD-1}$  and  $K1^{mdr1-SNYD-2}$ , their recombinant control  $K1^{mdr1-SNFD}$  and the parent K1. PCR was performed with primers p6 + p7, which were specific for the recombinant locus only and which together yielded no band in K1. The  $pfmdr1$  gene was fully sequenced for each line using PCR products obtained with primers p17 + p18 (5' end of

gene) and p6 + p7 (3' end of gene; recombinant lines) or p7 + p8 (3' end of gene; K1). The non-synonymous mutations identified (compared to the wild-type 3D7 sequence) were as predicted (N86Y for all lines and F1226Y for K1<sup>mdr1-SNYD-1</sup> and K1<sup>mdr1-SNYD-2</sup> only). **(C)** RT-PCR of K1<sup>mdr1-SNYD-1</sup> and K1<sup>mdr1-SNYD-2</sup>, their recombinant control K1<sup>mdr1-SNFD</sup> and the parent K1, using primers p5 + p6 and p5 + p8. Primer pair p5 + p6 yielded a 1.0 kb c-DNA product with the *pfmdr1* recombinant lines only, whereas p5 + p8 yielded a 1.1 kb band with only the parental K1 strain and not with the recombinant clones.

**Supplementary Table 1 | Prevalence of PfMDR1 haplotypes at positions 86/184 and copy number variations and PfCRT residue 76 status in sampled malaria-endemic countries.**

| Country    | Region    | Total Isolates | PfMDR1 haplotypes at positions 86/184<br>total number (percentage of total) |            |             |             | <i>pfmdr1</i> Copy Number Variation > 1.5-fold<br>total number (percentage of total) |            |          |          |            |            | PfCRT status |             |
|------------|-----------|----------------|-----------------------------------------------------------------------------|------------|-------------|-------------|--------------------------------------------------------------------------------------|------------|----------|----------|------------|------------|--------------|-------------|
|            |           |                | YF                                                                          | YY         | NF          | NY          | No CNV                                                                               | CNV >1.5x  | YF + CNV | YY + CNV | NF + CNV   | NY + CNV   | K76          | K76T        |
| DR Congo   | Africa    | 113            | 17 (15.0%)                                                                  | 35 (31.0%) | 29 (25.7%)  | 32 (28.3%)  | 107 (94.7%)                                                                          | 6 (5.3%)   | 0        | 1 (0.9%) | 3 (2.6%)   | 2 (1.8%)   | 33 (29.2%)   | 80 (70.8%)  |
| Ghana      | Africa    | 617            | 100 (16.2%)                                                                 | 23 (3.7%)  | 326 (52.8%) | 168 (27.2%) | 613 (99.4%)                                                                          | 4 (0.6%)   | 0        | 0        | 3 (0.5%)   | 1 (0.2%)   | 492 (79.7%)  | 125 (20.3%) |
| Guinea     | Africa    | 100            | 29 (29.0%)                                                                  | 9 (9.0%)   | 38 (38.0%)  | 24 (24.0%)  | 100 (100%)                                                                           | 0          | 0        | 0        | 0          | 0          | 27 (27.0%)   | 73 (73.0%)  |
| Malawi     | Africa    | 369            | 4 (1.1%)                                                                    | 3 (0.8%)   | 193 (52.3%) | 169 (45.8%) | 369 (100%)                                                                           | 0          | 0        | 0        | 0          | 0          | 369 (100%)   | 0           |
| Mali       | Africa    | 96             | 31 (32.3%)                                                                  | 2 (2.1%)   | 38 (39.6%)  | 25 (26.0%)  | 96 (100%)                                                                            | 0          | 0        | 0        | 0          | 0          | 41 (42.7%)   | 55 (57.3%)  |
| Nigeria    | Africa    | 5              | 2 (40.0%)                                                                   | 0          | 2 (40.0%)   | 1 (20.0%)   | 5 (100%)                                                                             | 0          | 0        | 0        | 0          | 0          | 1 (20.0%)    | 4 (80.0%)   |
| Senegal    | Africa    | 137            | 17 (12.4%)                                                                  | 2 (1.5%)   | 71 (51.8%)  | 47 (34.3%)  | 135 (98.5%)                                                                          | 2 (1.5%)   | 0        | 0        | 0          | 2 (1.5%)   | 77 (56.2%)   | 60 (43.8%)  |
| The Gambia | Africa    | 65             | 17 (26.2%)                                                                  | 1 (1.5%)   | 24 (36.9%)  | 23 (35.4%)  | 65 (100%)                                                                            | 0          | 0        | 0        | 0          | 0          | 19 (29.2%)   | 46 (70.8%)  |
| Bangladesh | S. Asia   | 50             | 0                                                                           | 11 (22.0%) | 10 (20.0%)  | 29 (58.0%)  | 47 (94.0%)                                                                           | 3 (6.0%)   | 0        | 0        | 0          | 3 (6.0%)   | 4 (8.0%)     | 46 (92.0%)  |
| Cambodia   | S.E. Asia | 570            | 0                                                                           | 0          | 312 (54.7%) | 258 (45.3%) | 489 (85.8%)                                                                          | 81 (14.2%) | 0        | 0        | 66 (11.6%) | 15 (2.6%)  | 12 (2.1%)    | 558 (97.9%) |
| Laos       | S.E. Asia | 85             | 0                                                                           | 0          | 3 (3.5%)    | 82 (96.5%)  | 85 (100%)                                                                            | 0          | 0        | 0        | 0          | 0          | 4 (4.7%)     | 81 (95.3%)  |
| Myanmar    | S.E. Asia | 60             | 0                                                                           | 0          | 24 (40.0%)  | 36 (60.0%)  | 53 (88.3%)                                                                           | 7 (11.7%)  | 0        | 0        | 3 (5.0%)   | 4 (6.7%)   | 0            | 60 (100%)   |
| Thailand   | S.E. Asia | 148            | 0                                                                           | 1 (0.7%)   | 43 (29.0%)  | 104 (70.3%) | 90 (60.8%)                                                                           | 58 (39.2%) | 0        | 0        | 9 (6.1%)   | 49 (33.1%) | 0            | 148 (100%)  |
| Vietnam    | S.E. Asia | 97             | 0                                                                           | 0          | 22 (22.7%)  | 75 (77.3%)  | 91 (93.8%)                                                                           | 6 (6.2%)   | 0        | 0        | 4 (4.1%)   | 2 (2.1%)   | 2 (2.1%)     | 95 (97.9%)  |

This analysis used data generated by the Pf3k project ([www.malariagen.net/pf3k](http://www.malariagen.net/pf3k)). S. E., Southeast.

**Supplementary Table 2 | Copy number analysis of *pfmdr1*-modified recombinant lines.**

| <b>Parasite line</b>           | <b>Mean estimate</b> | <b>Standard error</b> | <b>Calculated <i>pfmdr1</i> copy number</b> | <b>Number of independent repeats</b> |
|--------------------------------|----------------------|-----------------------|---------------------------------------------|--------------------------------------|
| NF10 (YF)                      | 0.96                 | 0.12                  | 1                                           | 3                                    |
| NF10 <sup><i>mdr1</i>-YF</sup> | 1.04                 | 0.15                  | 1                                           | 3                                    |
| NF10 <sup><i>mdr1</i>-YY</sup> | 1.01                 | 0.04                  | 1                                           | 2                                    |
| NF10 <sup><i>mdr1</i>-NF</sup> | 1.15                 | 0.13                  | 1                                           | 3                                    |
| NF10 <sup><i>mdr1</i>-NY</sup> | 0.95                 | 0.14                  | 1                                           | 3                                    |
| FCB                            | 1.85                 | 0.08                  | 2                                           | 2                                    |
| KC5 (YF)                       | 0.97                 | 0.27                  | 1                                           | 3                                    |
| KC5 <sup><i>mdr1</i>-YF</sup>  | 0.92                 | 0.10                  | 1                                           | 4                                    |
| KC5 <sup><i>mdr1</i>-YY</sup>  | 1.09                 | 0.13                  | 1                                           | 4                                    |
| KC5 <sup><i>mdr1</i>-NF</sup>  | 0.94                 | 0.11                  | 1                                           | 4                                    |
| KC5 <sup><i>mdr1</i>-NY</sup>  | 0.89                 | 0.16                  | 1                                           | 4                                    |
| FCB                            | 1.88                 | 0.05                  | 2                                           | 4                                    |

*pfmdr1* copy number was determined using a published Taqman assay (see Methods). n.d., not determined.



Supplementary Table 3 (page 1 of 2) | Mean±SEM IC<sub>50</sub> values (nM) of NF10 parental strain and *pfmdr1*-modified recombinant lines.

| Line                             | NF10 (YF)          | NF10 <sup><i>mdr1</i>-YF-1</sup> | NF10 <sup><i>mdr1</i>-YY-1</sup> | NF10 <sup><i>mdr1</i>-YY-2</sup> | NF10 <sup><i>mdr1</i>-NF-1</sup> | NF10 <sup><i>mdr1</i>-NF-2</sup> | NF10 <sup><i>mdr1</i>-NY-1</sup> | NF10 <sup><i>mdr1</i>-NY-2</sup> |
|----------------------------------|--------------------|----------------------------------|----------------------------------|----------------------------------|----------------------------------|----------------------------------|----------------------------------|----------------------------------|
| <b>LMF IC<sub>50</sub> (nM)</b>  | <b>0.9 ± 0.1</b>   | <b>0.9 ± 0.1</b>                 | <b>0.9 ± 0.1</b>                 | <b>0.9 ± 0.1</b>                 | <b>3.1 ± 0.4</b>                 | <b>2.7 ± 0.3</b>                 | <b>3.2 ± 0.4</b>                 | <b>3.1 ± 0.3</b>                 |
| # assays                         | 7                  | 7                                | 7                                | 7                                | 5                                | 5                                | 6                                | 6                                |
| p value                          |                    |                                  | 0.81                             | 0.81                             | 0.0025                           | 0.0025                           | 0.0012                           | 0.0012                           |
| NF10 <sup><i>mdr1</i>-YF-1</sup> |                    |                                  |                                  |                                  | 0.0025                           | 0.0025                           | 0.0012                           | 0.0012                           |
| NF10 <sup><i>mdr1</i>-YY-1</sup> |                    |                                  |                                  | 0.90                             | 0.0025                           | 0.0025                           | 0.0012                           | 0.0012                           |
| NF10 <sup><i>mdr1</i>-YY-2</sup> |                    |                                  |                                  |                                  | 0.0025                           | 0.0025                           | 0.0012                           | 0.0012                           |
| NF10 <sup><i>mdr1</i>-NF-1</sup> |                    |                                  |                                  |                                  |                                  | 0.55                             | 0.66                             | 0.93                             |
| NF10 <sup><i>mdr1</i>-NF-2</sup> |                    |                                  |                                  |                                  |                                  |                                  | 0.33                             | 0.43                             |
| NF10 <sup><i>mdr1</i>-NY-1</sup> |                    |                                  |                                  |                                  |                                  |                                  |                                  | 0.94                             |
| <b>MFQ IC<sub>50</sub> (nM)</b>  | <b>3.9 ± 0.2</b>   | <b>4.0 ± 0.3</b>                 | <b>4.1 ± 0.3</b>                 | <b>3.9 ± 0.2</b>                 | <b>12.8 ± 0.9</b>                | <b>12.3 ± 1.0</b>                | <b>12.5 ± 1.1</b>                | <b>12.6 ± 1.1</b>                |
| # assays                         | 7                  | 7                                | 7                                | 7                                | 7                                | 7                                | 7                                | 7                                |
| p value                          |                    |                                  | 0.81                             | 0.62                             | 0.0006                           | 0.0006                           | 0.0006                           | 0.0006                           |
| NF10 <sup><i>mdr1</i>-YF-1</sup> |                    |                                  |                                  |                                  | 0.0006                           | 0.0006                           | 0.0006                           | 0.0006                           |
| NF10 <sup><i>mdr1</i>-YY-1</sup> |                    |                                  |                                  | p>0.9999                         | 0.0006                           | 0.0006                           | 0.0006                           | 0.0006                           |
| NF10 <sup><i>mdr1</i>-YY-2</sup> |                    |                                  |                                  |                                  | 0.0006                           | 0.0006                           | 0.0006                           | 0.0006                           |
| NF10 <sup><i>mdr1</i>-NF-1</sup> |                    |                                  |                                  |                                  |                                  | 0.62                             | 0.62                             | 0.90                             |
| NF10 <sup><i>mdr1</i>-NF-2</sup> |                    |                                  |                                  |                                  |                                  |                                  | 0.81                             | p>0.9999                         |
| NF10 <sup><i>mdr1</i>-NY-1</sup> |                    |                                  |                                  |                                  |                                  |                                  |                                  | 0.71                             |
| <b>DHA IC<sub>50</sub> (nM)</b>  | <b>0.60 ± 0.04</b> | <b>0.61 ± 0.05</b>               | <b>0.62 ± 0.05</b>               | <b>0.61 ± 0.03</b>               | <b>0.93 ± 0.13</b>               | <b>0.84 ± 0.12</b>               | <b>0.97 ± 0.12</b>               | <b>0.89 ± 0.09</b>               |
| # assays                         | 7                  | 7                                | 7                                | 7                                | 7                                | 7                                | 7                                | 7                                |
| p value                          |                    |                                  | 0.81                             | 0.62                             | 0.0070                           | 0.04                             | 0.0070                           | 0.02                             |
| NF10 <sup><i>mdr1</i>-YF-1</sup> |                    |                                  |                                  |                                  | 0.03                             | 0.07                             | 0.02                             | 0.04                             |
| NF10 <sup><i>mdr1</i>-YY-1</sup> |                    |                                  |                                  | 0.71                             | 0.0070                           | 0.04                             | 0.0070                           | 0.03                             |
| NF10 <sup><i>mdr1</i>-YY-2</sup> |                    |                                  |                                  |                                  |                                  | 0.32                             | 0.81                             | p>0.9999                         |
| NF10 <sup><i>mdr1</i>-NF-1</sup> |                    |                                  |                                  |                                  |                                  |                                  | 0.26                             | 0.32                             |
| NF10 <sup><i>mdr1</i>-NF-2</sup> |                    |                                  |                                  |                                  |                                  |                                  |                                  | 0.81                             |
| NF10 <sup><i>mdr1</i>-NY-1</sup> |                    |                                  |                                  |                                  |                                  |                                  |                                  |                                  |
| <b>PPQ IC<sub>50</sub> (nM)</b>  | <b>41.8 ± 3.4</b>  | <b>40.2 ± 2.5</b>                | <b>37.4 ± 4.4</b>                | <b>35.4 ± 3.3</b>                | <b>35.4 ± 2.1</b>                | <b>35.1 ± 1.0</b>                | <b>31.4 ± 1.5</b>                | <b>28.9 ± 1.0</b>                |
| # assays                         | 6                  | 6                                | 6                                | 6                                | 6                                | 6                                | 6                                | 6                                |
| p value                          |                    |                                  | 0.7                              | 0.39                             | 0.31                             | 0.09                             | 0.0087                           | 0.0022                           |
| NF10 <sup><i>mdr1</i>-YF-1</sup> |                    |                                  |                                  |                                  | 0.94                             | 0.82                             | 0.39                             | 0.18                             |
| NF10 <sup><i>mdr1</i>-YY-1</sup> |                    |                                  |                                  | 0.82                             | 0.94                             | 0.82                             | 0.70                             | 0.18                             |
| NF10 <sup><i>mdr1</i>-YY-2</sup> |                    |                                  |                                  |                                  |                                  | 0.94                             | 0.24                             | 0.04                             |
| NF10 <sup><i>mdr1</i>-NF-1</sup> |                    |                                  |                                  |                                  |                                  |                                  | 0.09                             | 0.0087                           |
| NF10 <sup><i>mdr1</i>-NF-2</sup> |                    |                                  |                                  |                                  |                                  |                                  |                                  | 0.39                             |
| NF10 <sup><i>mdr1</i>-NY-1</sup> |                    |                                  |                                  |                                  |                                  |                                  |                                  |                                  |

**Supplementary Table 3 (page 2 of 2) | Mean±SEM IC<sub>50</sub> values (nM) of NF10 parental strain and *pfmdr1*-modified recombinant lines.**

| <b>CQ IC<sub>50</sub> (nM)</b>     | <b>347.1 ± 24.4</b>              | <b>328.2 ± 29.7</b>  | <b>331.1 ± 24.5</b>   | <b>331.2 ± 21.1</b>  | <b>216.2 ± 15.3</b> | <b>204.8 ± 12.1</b> | <b>186.6 ± 10.4</b> | <b>184.5 ± 6.6</b>  |
|------------------------------------|----------------------------------|----------------------|-----------------------|----------------------|---------------------|---------------------|---------------------|---------------------|
| # assays                           | 6                                | 6                    | 6                     | 6                    | 6                   | 6                   | 6                   | 6                   |
| p value                            | NF10 <sup><i>mdr1</i>-YF-1</sup> |                      | 0.94                  | p>0.9999             | 0.04                | 0.04                | 0.04                | 0.03                |
|                                    | NF10 <sup><i>mdr1</i>-YY-1</sup> |                      |                       | p>0.9999             | 0.0043              | 0.0043              | 0.0022              | 0.0022              |
|                                    | NF10 <sup><i>mdr1</i>-YY-2</sup> |                      |                       |                      | 0.0043              | 0.0043              | 0.0022              | 0.0022              |
|                                    | NF10 <sup><i>mdr1</i>-NF-1</sup> |                      |                       |                      |                     | 0.31                | 0.04                | 0.04                |
|                                    | NF10 <sup><i>mdr1</i>-NF-2</sup> |                      |                       |                      |                     |                     | 0.24                | 0.07                |
|                                    | NF10 <sup><i>mdr1</i>-NY-1</sup> |                      |                       |                      |                     |                     |                     | 0.24                |
| <b>md-CQ IC<sub>50</sub> (nM)</b>  | <b>1187.0 ± 97.6</b>             | <b>1193.3 ± 84.5</b> | <b>1109.9 ± 106.2</b> | <b>1065.3 ± 79.8</b> | <b>881.2 ± 61.7</b> | <b>796.6 ± 33.5</b> | <b>780.4 ± 38.6</b> | <b>743.4 ± 35.4</b> |
| # assays                           | 6                                | 6                    | 6                     | 6                    | 6                   | 6                   | 6                   | 6                   |
| p value                            | NF10 <sup><i>mdr1</i>-YF-1</sup> |                      | 0.59                  | 0.31                 | 0.04                | 0.03                | 0.02                | 0.0087              |
|                                    | NF10 <sup><i>mdr1</i>-YY-1</sup> |                      |                       | 0.82                 | 0.31                | 0.07                | 0.07                | 0.0087              |
|                                    | NF10 <sup><i>mdr1</i>-YY-2</sup> |                      |                       |                      | 0.13                | 0.0087              | 0.0043              | 0.0022              |
|                                    | NF10 <sup><i>mdr1</i>-NF-1</sup> |                      |                       |                      |                     | 0.18                | 0.09                | 0.04                |
|                                    | NF10 <sup><i>mdr1</i>-NF-2</sup> |                      |                       |                      |                     |                     | 0.94                | 0.49                |
|                                    | NF10 <sup><i>mdr1</i>-NY-1</sup> |                      |                       |                      |                     |                     |                     | 0.31                |
| <b>md-ADQ IC<sub>50</sub> (nM)</b> | <b>76.8 ± 5.2</b>                | <b>76.1 ± 5.0</b>    | <b>76.8 ± 4.7</b>     | <b>77.2 ± 3.8</b>    | <b>47.1 ± 1.6</b>   | <b>44.8 ± 0.6</b>   | <b>45.0 ± 1.2</b>   | <b>42.7 ± 0.6</b>   |
| # assays                           | 6                                | 6                    | 6                     | 6                    | 6                   | 6                   | 6                   | 6                   |
| p value                            | NF10 <sup><i>mdr1</i>-YF-1</sup> |                      | 0.82                  | 0.94                 | 0.0022              | 0.0022              | 0.0022              | 0.0022              |
|                                    | NF10 <sup><i>mdr1</i>-YY-1</sup> |                      |                       | p>0.9999             | 0.0022              | 0.0022              | 0.0022              | 0.0022              |
|                                    | NF10 <sup><i>mdr1</i>-YY-2</sup> |                      |                       |                      | 0.0022              | 0.0022              | 0.0022              | 0.0022              |
|                                    | NF10 <sup><i>mdr1</i>-NF-1</sup> |                      |                       |                      |                     | 0.31                | 0.70                | 0.04                |
|                                    | NF10 <sup><i>mdr1</i>-NF-2</sup> |                      |                       |                      |                     |                     | 0.59                | 0.09                |
|                                    | NF10 <sup><i>mdr1</i>-NY-1</sup> |                      |                       |                      |                     |                     |                     | 0.18                |
| <b>QN IC<sub>50</sub> (nM)</b>     | <b>121.5 ± 8.8</b>               | <b>127.1 ± 6.1</b>   | <b>137.6 ± 6.3</b>    | <b>126.1 ± 3.2</b>   | <b>103.6 ± 6.5</b>  | <b>99.5 ± 6.3</b>   | <b>107.2 ± 5.7</b>  | <b>98.8 ± 6.7</b>   |
| # assays                           | 5                                | 5                    | 5                     | 5                    | 5                   | 5                   | 5                   | 5                   |
| p value                            | NF10 <sup><i>mdr1</i>-YF-1</sup> |                      | 0.42                  | 0.84                 | 0.06                | 0.02                | 0.10                | 0.02                |
|                                    | NF10 <sup><i>mdr1</i>-YY-1</sup> |                      |                       | 0.15                 | 0.02                | 0.02                | 0.02                | 0.02                |
|                                    | NF10 <sup><i>mdr1</i>-YY-2</sup> |                      |                       |                      | 0.03                | 0.03                | 0.06                | 0.03                |
|                                    | NF10 <sup><i>mdr1</i>-NF-1</sup> |                      |                       |                      |                     | 0.84                | 0.69                | 0.55                |
|                                    | NF10 <sup><i>mdr1</i>-NF-2</sup> |                      |                       |                      |                     |                     | 0.22                | p>0.9999            |
|                                    | NF10 <sup><i>mdr1</i>-NY-1</sup> |                      |                       |                      |                     |                     |                     | 0.55                |

IC<sub>50</sub> values are expressed as mean ± SEM. (LMF) lumefantrine, (MFQ) mefloquine, (DHA) dihydroartemisinin, (PPQ) piperazine, (CQ) chloroquine, (md-CQ) monodesethyl-chloroquine, (md-ADQ) monodesethyl-amodiaquine and (QN) quinine.

Statistical comparisons were made using Mann–Whitney U test.

Color code:

|                 |        |        |         |
|-----------------|--------|--------|---------|
| not significant | p<0.05 | p<0.01 | p<0.001 |
|-----------------|--------|--------|---------|

Supplementary Table 4 (page 1 of 2) | Mean±SEM IC<sub>50</sub> values (nM) of KC5 parental strain and *pfmdr1*-modified recombinant lines.

| Line                            | KC5 (YF)           | KC5 <sup><i>mdr1</i>-YF-1</sup> | KC5 <sup><i>mdr1</i>-YY-1</sup> | KC5 <sup><i>mdr1</i>-NF-1</sup> | KC5 <sup><i>mdr1</i>-NF-2</sup> | KC5 <sup><i>mdr1</i>-NY-1</sup> | KC5 <sup><i>mdr1</i>-NY-2</sup> |
|---------------------------------|--------------------|---------------------------------|---------------------------------|---------------------------------|---------------------------------|---------------------------------|---------------------------------|
| <b>LMF IC<sub>50</sub> (nM)</b> | <b>0.8 ± 0.2</b>   | <b>0.8 ± 0.1</b>                | <b>0.7 ± 0.1</b>                | <b>2.6 ± 0.4</b>                | <b>2.9 ± 0.5</b>                | <b>3.1 ± 0.4</b>                | <b>3.8 ± 0.4</b>                |
| # assays                        | 8                  | 10                              | 10                              | 10                              | 8                               | 10                              | 8                               |
| p value                         |                    |                                 | 0.68                            | 0.0001                          | <0.0001                         | <0.0001                         | <0.0001                         |
| KC5 <sup><i>mdr1</i>-YF-1</sup> |                    |                                 |                                 | <0.0001                         | <0.0001                         | <0.0001                         | <0.0001                         |
| KC5 <sup><i>mdr1</i>-YY-1</sup> |                    |                                 |                                 |                                 | 0.41                            | 0.28                            | 0.04                            |
| KC5 <sup><i>mdr1</i>-NF-1</sup> |                    |                                 |                                 |                                 |                                 | 0.41                            | 0.04                            |
| KC5 <sup><i>mdr1</i>-NF-2</sup> |                    |                                 |                                 |                                 |                                 |                                 | 0.32                            |
| KC5 <sup><i>mdr1</i>-NY-1</sup> |                    |                                 |                                 |                                 |                                 |                                 |                                 |
| <b>MFQ IC<sub>50</sub> (nM)</b> | <b>2.9 ± 0.3</b>   | <b>3.5 ± 0.3</b>                | <b>2.9 ± 0.2</b>                | <b>10.1 ± 0.6</b>               | <b>11.0 ± 0.3</b>               | <b>12.1 ± 0.9</b>               | <b>14.1 ± 0.6</b>               |
| # assays                        | 8                  | 9                               | 10                              | 9                               | 7                               | 9                               | 7                               |
| p value                         |                    |                                 | 0.24                            | <0.0001                         | 0.0002                          | <0.0001                         | 0.0002                          |
| KC5 <sup><i>mdr1</i>-YF-1</sup> |                    |                                 |                                 | <0.0001                         | 0.0001                          | <0.0001                         | 0.0001                          |
| KC5 <sup><i>mdr1</i>-YY-1</sup> |                    |                                 |                                 |                                 | 0.35                            | 0.05                            | 0.0007                          |
| KC5 <sup><i>mdr1</i>-NF-1</sup> |                    |                                 |                                 |                                 |                                 | 0.25                            | 0.0006                          |
| KC5 <sup><i>mdr1</i>-NF-2</sup> |                    |                                 |                                 |                                 |                                 |                                 | 0.14                            |
| KC5 <sup><i>mdr1</i>-NY-1</sup> |                    |                                 |                                 |                                 |                                 |                                 |                                 |
| <b>DHA IC<sub>50</sub> (nM)</b> | <b>0.53 ± 0.03</b> | <b>0.49 ± 0.06</b>              | <b>0.45 ± 0.04</b>              | <b>0.73 ± 0.06</b>              | <b>0.77 ± 0.1</b>               | <b>0.77 ± 0.04</b>              | <b>0.77 ± 0.06</b>              |
| # assays                        | 8                  | 9                               | 9                               | 8                               | 8                               | 9                               | 7                               |
| p value                         |                    |                                 | 0.55                            | 0.0055                          | 0.04                            | 0.0012                          | 0.0052                          |
| KC5 <sup><i>mdr1</i>-YF-1</sup> |                    |                                 |                                 | 0.0003                          | 0.0079                          | <0.0001                         | 0.0007                          |
| KC5 <sup><i>mdr1</i>-YY-1</sup> |                    |                                 |                                 |                                 | 0.80                            | 0.24                            | 0.69                            |
| KC5 <sup><i>mdr1</i>-NF-1</sup> |                    |                                 |                                 |                                 |                                 | 0.54                            | 0.87                            |
| KC5 <sup><i>mdr1</i>-NF-2</sup> |                    |                                 |                                 |                                 |                                 |                                 | p>0.9999                        |
| KC5 <sup><i>mdr1</i>-NY-1</sup> |                    |                                 |                                 |                                 |                                 |                                 |                                 |
| <b>PPQ IC<sub>50</sub> (nM)</b> | <b>37.3 ± 3.6</b>  | <b>34.5 ± 4.0</b>               | <b>32.0 ± 2.8</b>               | <b>33.3 ± 3.1</b>               | <b>30.3 ± 2.5</b>               | <b>33.7 ± 2.7</b>               | <b>30.3 ± 1.6</b>               |
| # assays                        | 8                  | 8                               | 8                               | 8                               | 7                               | 8                               | 7                               |
| p value                         |                    |                                 | 0.96                            | 0.96                            | 0.46                            | p>0.9999                        | 0.87                            |
| KC5 <sup><i>mdr1</i>-YF-1</sup> |                    |                                 |                                 | 0.57                            | 0.69                            | 0.51                            | 0.78                            |
| KC5 <sup><i>mdr1</i>-YY-1</sup> |                    |                                 |                                 |                                 | 0.46                            | 0.96                            | 0.28                            |
| KC5 <sup><i>mdr1</i>-NF-1</sup> |                    |                                 |                                 |                                 |                                 | 0.34                            | 0.80                            |
| KC5 <sup><i>mdr1</i>-NF-2</sup> |                    |                                 |                                 |                                 |                                 |                                 | 0.28                            |
| KC5 <sup><i>mdr1</i>-NY-1</sup> |                    |                                 |                                 |                                 |                                 |                                 | 0.28                            |

**Supplementary Table 4 (page 2 of 2) | Mean±SEM IC<sub>50</sub> values (nM) of KC5 parental strain and *pfmdr1*-modified recombinant lines.**

|                                    |                     |                     |                     |                     |                     |                     |                     |
|------------------------------------|---------------------|---------------------|---------------------|---------------------|---------------------|---------------------|---------------------|
| <b>CQ IC<sub>50</sub> (nM)</b>     | <b>152.0 ± 16.9</b> | <b>112.0 ± 6.2</b>  | <b>110.9 ± 5.9</b>  | <b>91.8 ± 9.7</b>   | <b>87.2 ± 7.8</b>   | <b>78.6 ± 3.4</b>   | <b>82.5 ± 3.8</b>   |
| # assays                           | 6                   | 6                   | 6                   | 6                   | 6                   | 6                   | 6                   |
| p value                            |                     |                     | p>0.9999            | 0.13                | 0.04                | 0.0022              | 0.0043              |
| KC5 <sup><i>mdr1</i>-YF-1</sup>    |                     |                     |                     |                     |                     |                     |                     |
| KC5 <sup><i>mdr1</i>-YY-1</sup>    |                     |                     |                     | 0.24                | 0.07                | 0.0043              | 0.0087              |
| KC5 <sup><i>mdr1</i>-NF-1</sup>    |                     |                     |                     |                     | 0.82                | 0.31                | 0.59                |
| KC5 <sup><i>mdr1</i>-NF-2</sup>    |                     |                     |                     |                     |                     | 0.39                | 0.59                |
| KC5 <sup><i>mdr1</i>-NY-1</sup>    |                     |                     |                     |                     |                     |                     | 0.48                |
| <b>md-CQ IC<sub>50</sub> (nM)</b>  | <b>716.6 ± 63.4</b> | <b>676.8 ± 51.9</b> | <b>681.5 ± 43.0</b> | <b>579.5 ± 59.1</b> | <b>560.8 ± 50.9</b> | <b>565.1 ± 49.3</b> | <b>574.4 ± 40.0</b> |
| # assays                           | 7                   | 9                   | 8                   | 8                   | 8                   | 9                   | 8                   |
| p value                            |                     |                     | 0.96                | 0.24                | 0.14                | 0.19                | 0.20                |
| KC5 <sup><i>mdr1</i>-YF-1</sup>    |                     |                     |                     |                     |                     |                     |                     |
| KC5 <sup><i>mdr1</i>-YY-1</sup>    |                     |                     |                     | 0.20                | 0.11                | 0.06                | 0.08                |
| KC5 <sup><i>mdr1</i>-NF-1</sup>    |                     |                     |                     |                     | 0.88                | 0.74                | 0.80                |
| KC5 <sup><i>mdr1</i>-NF-2</sup>    |                     |                     |                     |                     |                     | 0.96                | 0.72                |
| KC5 <sup><i>mdr1</i>-NY-1</sup>    |                     |                     |                     |                     |                     |                     | 0.96                |
| <b>md-ADQ IC<sub>50</sub> (nM)</b> | <b>154.6 ± 7.9</b>  | <b>128.4 ± 9.6</b>  | <b>131.0 ± 10.6</b> | <b>92.8 ± 3.7</b>   | <b>89.4 ± 3.9</b>   | <b>86.7 ± 3.3</b>   | <b>89.4 ± 4.6</b>   |
| # assays                           | 8                   | 8                   | 8                   | 8                   | 8                   | 8                   | 8                   |
| p value                            |                     |                     | 0.88                | 0.0011              | 0.0011              | 0.0006              | 0.0011              |
| KC5 <sup><i>mdr1</i>-YF-1</sup>    |                     |                     |                     |                     |                     |                     |                     |
| KC5 <sup><i>mdr1</i>-YY-1</sup>    |                     |                     |                     | 0.0030              | 0.0011              | 0.0006              | 0.0011              |
| KC5 <sup><i>mdr1</i>-NF-1</sup>    |                     |                     |                     |                     | 0.65                | 0.20                | 0.57                |
| KC5 <sup><i>mdr1</i>-NF-2</sup>    |                     |                     |                     |                     |                     | 0.33                | 0.96                |
| KC5 <sup><i>mdr1</i>-NY-1</sup>    |                     |                     |                     |                     |                     |                     | 0.88                |
| <b>QN IC<sub>50</sub> (nM)</b>     | <b>33.4 ± 2.2</b>   | <b>34.6 ± 2.2</b>   | <b>35.3 ± 2.3</b>   | <b>32.1 ± 1.5</b>   | <b>32.1 ± 1.5</b>   | <b>37.9 ± 1.3</b>   | <b>36.5 ± 1.9</b>   |
| # assays                           | 7                   | 8                   | 8                   | 7                   | 8                   | 9                   | 8                   |
| p value                            |                     |                     | 0.88                | 0.46                | 0.23                | 0.32                | 0.33                |
| KC5 <sup><i>mdr1</i>-YF-1</sup>    |                     |                     |                     |                     |                     |                     |                     |
| KC5 <sup><i>mdr1</i>-YY-1</sup>    |                     |                     |                     | 0.28                | 0.20                | 0.48                | 0.80                |
| KC5 <sup><i>mdr1</i>-NF-1</sup>    |                     |                     |                     |                     | 0.78                | 0.01                | 0.02                |
| KC5 <sup><i>mdr1</i>-NF-2</sup>    |                     |                     |                     |                     |                     | 0.01                | 0.13                |
| KC5 <sup><i>mdr1</i>-NY-1</sup>    |                     |                     |                     |                     |                     |                     | 0.74                |

IC<sub>50</sub> values (expressed as mean ± SEM). (LMF) lumefantrine, (MFQ) mefloquine, (DHA) dihydroartemisinin, (PPQ) piperazine, (CQ) chloroquine, (md-CQ) monodesethyl-chloroquine, (md-ADQ) monodesethyl-amodiaquine and (QN) quinine.

Statistical comparisons made using Mann–Whitney U test.

Color code:

|                 |        |        |         |
|-----------------|--------|--------|---------|
| not significant | p<0.05 | p<0.01 | p<0.001 |
|-----------------|--------|--------|---------|

**Supplementary Table 5 (page 1 of 2) | Mean±SEM IC<sub>90</sub> values (nM) of NF10 parental strain and *pfmdr1*-modified recombinant lines.**

| Line                             | NF10 (YF)         | NF10 <sup><i>mdr1</i>-YF-1</sup> | NF10 <sup><i>mdr1</i>-YY-1</sup> | NF10 <sup><i>mdr1</i>-YY-2</sup> | NF10 <sup><i>mdr1</i>-NF-1</sup> | NF10 <sup><i>mdr1</i>-NF-2</sup> | NF10 <sup><i>mdr1</i>-NY-1</sup> | NF10 <sup><i>mdr1</i>-NY-2</sup> |
|----------------------------------|-------------------|----------------------------------|----------------------------------|----------------------------------|----------------------------------|----------------------------------|----------------------------------|----------------------------------|
| <b>LMF IC<sub>90</sub> (nM)</b>  | <b>2.8 ± 0.1</b>  | <b>3.1 ± 0.3</b>                 | <b>3.0 ± 0.3</b>                 | <b>2.9 ± 0.2</b>                 | <b>7.0 ± 0.7</b>                 | <b>6.6 ± 0.7</b>                 | <b>8.8 ± 0.8</b>                 | <b>8.3 ± 1.1</b>                 |
| # assays                         | 7                 | 7                                | 7                                | 7                                | 5                                | 5                                | 6                                | 6                                |
| p value                          |                   |                                  | 0.90                             | p>0.9999                         | 0.0025                           | 0.0025                           | 0.0012                           | 0.0012                           |
| NF10 <sup><i>mdr1</i>-YF-1</sup> |                   |                                  |                                  |                                  | 0.0025                           | 0.0025                           | 0.0012                           | 0.0012                           |
| NF10 <sup><i>mdr1</i>-YY-1</sup> |                   |                                  |                                  | 0.71                             | 0.0025                           | 0.0025                           | 0.0012                           | 0.0012                           |
| NF10 <sup><i>mdr1</i>-YY-2</sup> |                   |                                  |                                  |                                  | 0.0025                           | 0.0025                           | 0.0012                           | 0.0012                           |
| NF10 <sup><i>mdr1</i>-NF-1</sup> |                   |                                  |                                  |                                  |                                  | 0.69                             | 0.18                             | 0.43                             |
| NF10 <sup><i>mdr1</i>-NF-2</sup> |                   |                                  |                                  |                                  |                                  |                                  | 0.13                             | 0.25                             |
| NF10 <sup><i>mdr1</i>-NY-1</sup> |                   |                                  |                                  |                                  |                                  |                                  |                                  | 0.70                             |
| <b>MFQ IC<sub>90</sub> (nM)</b>  | <b>10.2 ± 0.5</b> | <b>10.6 ± 0.4</b>                | <b>10.2 ± 0.5</b>                | <b>10.5 ± 0.4</b>                | <b>26.0 ± 2.6</b>                | <b>25.5 ± 2.2</b>                | <b>25.0 ± 1.6</b>                | <b>25.9 ± 2.4</b>                |
| # assays                         | 7                 | 7                                | 7                                | 7                                | 7                                | 7                                | 7                                | 7                                |
| p value                          |                   |                                  | 0.54                             | 0.71                             | 0.0006                           | 0.0006                           | 0.0006                           | 0.0006                           |
| NF10 <sup><i>mdr1</i>-YF-1</sup> |                   |                                  |                                  |                                  | 0.0006                           | 0.0006                           | 0.0006                           | 0.0006                           |
| NF10 <sup><i>mdr1</i>-YY-1</sup> |                   |                                  |                                  | 0.80                             | 0.0006                           | 0.0006                           | 0.0006                           | 0.0006                           |
| NF10 <sup><i>mdr1</i>-YY-2</sup> |                   |                                  |                                  |                                  | 0.0006                           | 0.0006                           | 0.0006                           | 0.0006                           |
| NF10 <sup><i>mdr1</i>-NF-1</sup> |                   |                                  |                                  |                                  |                                  | p>0.9999                         | 0.62                             | 0.62                             |
| NF10 <sup><i>mdr1</i>-NF-2</sup> |                   |                                  |                                  |                                  |                                  |                                  | 0.62                             | 0.62                             |
| NF10 <sup><i>mdr1</i>-NY-1</sup> |                   |                                  |                                  |                                  |                                  |                                  |                                  | 0.46                             |
| <b>DHA IC<sub>90</sub> (nM)</b>  | <b>1.8 ± 0.2</b>  | <b>1.7 ± 0.2</b>                 | <b>1.8 ± 0.2</b>                 | <b>1.7 ± 0.1</b>                 | <b>2.4 ± 0.2</b>                 | <b>2.3 ± 0.2</b>                 | <b>2.5 ± 0.2</b>                 | <b>2.4 ± 0.2</b>                 |
| # assays                         | 7                 | 7                                | 7                                | 7                                | 7                                | 7                                | 7                                | 7                                |
| p value                          |                   |                                  | p>0.9999                         | 0.90                             | 0.03                             | 0.07                             | 0.01                             | 0.04                             |
| NF10 <sup><i>mdr1</i>-YF-1</sup> |                   |                                  |                                  |                                  | 0.03                             | 0.07                             | 0.01                             | 0.04                             |
| NF10 <sup><i>mdr1</i>-YY-1</sup> |                   |                                  |                                  | 0.90                             | 0.04                             | 0.07                             | 0.03                             | 0.04                             |
| NF10 <sup><i>mdr1</i>-YY-2</sup> |                   |                                  |                                  |                                  | 0.01                             | 0.05                             | 0.0070                           | 0.01                             |
| NF10 <sup><i>mdr1</i>-NF-1</sup> |                   |                                  |                                  |                                  |                                  | 0.80                             | 0.62                             | p>0.9999                         |
| NF10 <sup><i>mdr1</i>-NF-2</sup> |                   |                                  |                                  |                                  |                                  |                                  | 0.32                             | 0.80                             |
| NF10 <sup><i>mdr1</i>-NY-1</sup> |                   |                                  |                                  |                                  |                                  |                                  |                                  | p>0.9999                         |
| <b>PPQ IC<sub>90</sub> (nM)</b>  | <b>84.5 ± 8.4</b> | <b>82.3 ± 7.9</b>                | <b>76.9 ± 9.8</b>                | <b>72.2 ± 8.0</b>                | <b>61.8 ± 2.5</b>                | <b>61.8 ± 2.7</b>                | <b>57.4 ± 0.8</b>                | <b>56.0 ± 1.2</b>                |
| # assays                         | 6                 | 6                                | 6                                | 6                                | 6                                | 6                                | 6                                | 6                                |
| p value                          |                   |                                  | 0.59                             | 0.48                             | 0.09                             | 0.04                             | 0.0087                           | 0.0087                           |
| NF10 <sup><i>mdr1</i>-YF-1</sup> |                   |                                  |                                  |                                  | 0.09                             | 0.04                             | 0.0087                           | 0.0087                           |
| NF10 <sup><i>mdr1</i>-YY-1</sup> |                   |                                  |                                  | p>0.9999                         | 0.82                             | 0.70                             | 0.39                             | 0.13                             |
| NF10 <sup><i>mdr1</i>-YY-2</sup> |                   |                                  |                                  |                                  | 0.70                             | 0.39                             | 0.13                             | 0.04                             |
| NF10 <sup><i>mdr1</i>-NF-1</sup> |                   |                                  |                                  |                                  |                                  | 0.82                             | 0.18                             | 0.03                             |
| NF10 <sup><i>mdr1</i>-NF-2</sup> |                   |                                  |                                  |                                  |                                  |                                  | 0.06                             | 0.06                             |
| NF10 <sup><i>mdr1</i>-NY-1</sup> |                   |                                  |                                  |                                  |                                  |                                  |                                  | 0.59                             |

**Supplementary Table 5 (page 2 of 2) | Mean±SEM IC<sub>90</sub> values (nM) of NF10 parental strain and *pfmdr1*-modified recombinant lines.**

| <b>CQ IC<sub>90</sub> (nM)</b>     | <b>515.6 ± 33.4</b>  | <b>514.3 ± 42.3</b>  | <b>522.1 ± 28.4</b>  | <b>513.1 ± 36.1</b>  | <b>408.9 ± 30.2</b>  | <b>404.3 ± 26.3</b>  | <b>356.0 ± 27.3</b>  | <b>361.2 ± 26.2</b>  |
|------------------------------------|----------------------|----------------------|----------------------|----------------------|----------------------|----------------------|----------------------|----------------------|
| # assays                           | 6                    | 6                    | 6                    | 6                    | 6                    | 6                    | 6                    | 6                    |
| p value                            |                      |                      | p>0.9999             | p>0.9999             |                      |                      |                      |                      |
| NF10 <sup><i>mdr1</i>-YF-1</sup>   |                      |                      |                      |                      | 0.04                 | 0.03                 | 0.0043               | 0.0022               |
| NF10 <sup><i>mdr1</i>-YY-1</sup>   |                      |                      |                      | 0.70                 | 0.0022               | 0.0022               | 0.0022               | 0.0022               |
| NF10 <sup><i>mdr1</i>-YY-2</sup>   |                      |                      |                      |                      | 0.0043               | 0.0043               | 0.0022               | 0.0022               |
| NF10 <sup><i>mdr1</i>-NF-1</sup>   |                      |                      |                      |                      |                      | 0.70                 | 0.06                 | 0.0411               |
| NF10 <sup><i>mdr1</i>-NF-2</sup>   |                      |                      |                      |                      |                      |                      | 0.18                 | 0.13                 |
| NF10 <sup><i>mdr1</i>-NY-1</sup>   |                      |                      |                      |                      |                      |                      |                      | 0.70                 |
| <b>md-CQ IC<sub>90</sub> (nM)</b>  | <b>1859.4 ± 22.6</b> | <b>1866.3 ± 21.0</b> | <b>1834.5 ± 44.4</b> | <b>1852.6 ± 18.7</b> | <b>1726.3 ± 57.9</b> | <b>1651.0 ± 61.1</b> | <b>1643.9 ± 43.4</b> | <b>1514.3 ± 93.1</b> |
| # assays                           | 6                    | 6                    | 6                    | 6                    | 6                    | 6                    | 6                    | 6                    |
| p value                            |                      |                      | 0.82                 | 0.82                 |                      |                      |                      |                      |
| NF10 <sup><i>mdr1</i>-YF-1</sup>   |                      |                      |                      |                      | 0.04                 | 0.0022               | 0.0022               | 0.0022               |
| NF10 <sup><i>mdr1</i>-YY-1</sup>   |                      |                      |                      | 0.94                 | 0.24                 | 0.04                 | 0.03                 | 0.0087               |
| NF10 <sup><i>mdr1</i>-YY-2</sup>   |                      |                      |                      |                      | 0.04                 | 0.0022               | 0.0022               | 0.0022               |
| NF10 <sup><i>mdr1</i>-NF-1</sup>   |                      |                      |                      |                      |                      | 0.1797               | 0.18                 | 0.0411               |
| NF10 <sup><i>mdr1</i>-NF-2</sup>   |                      |                      |                      |                      |                      |                      | 0.70                 | 0.18                 |
| NF10 <sup><i>mdr1</i>-NY-1</sup>   |                      |                      |                      |                      |                      |                      |                      | 0.31                 |
| <b>md-ADQ IC<sub>90</sub> (nM)</b> | <b>115.7 ± 1.3</b>   | <b>116.4 ± 1.0</b>   | <b>115.7 ± 1.3</b>   | <b>116.5 ± 1.0</b>   | <b>72.8 ± 7.7</b>    | <b>65.8 ± 5.7</b>    | <b>59.4 ± 0.5</b>    | <b>58.7 ± 0.3</b>    |
| # assays                           | 6                    | 6                    | 6                    | 6                    | 6                    | 6                    | 6                    | 6                    |
| p value                            |                      |                      | 0.82                 | 0.94                 |                      |                      |                      |                      |
| NF10 <sup><i>mdr1</i>-YF-1</sup>   |                      |                      |                      |                      | 0.0022               | 0.0022               | 0.0022               | 0.0022               |
| NF10 <sup><i>mdr1</i>-YY-1</sup>   |                      |                      |                      | 0.82                 | 0.0022               | 0.0022               | 0.0022               | 0.0022               |
| NF10 <sup><i>mdr1</i>-YY-2</sup>   |                      |                      |                      |                      | 0.0022               | 0.0022               | 0.0022               | 0.0022               |
| NF10 <sup><i>mdr1</i>-NF-1</sup>   |                      |                      |                      |                      |                      | 0.39                 | 0.06                 | 0.0087               |
| NF10 <sup><i>mdr1</i>-NF-2</sup>   |                      |                      |                      |                      |                      |                      | 0.24                 | 0.03                 |
| NF10 <sup><i>mdr1</i>-NY-1</sup>   |                      |                      |                      |                      |                      |                      |                      | 0.39                 |
| <b>QN IC<sub>90</sub> (nM)</b>     | <b>310.6 ± 3.8</b>   | <b>312.7 ± 11.0</b>  | <b>315.0 ± 10.2</b>  | <b>297.6 ± 10.6</b>  | <b>202.8 ± 16.6</b>  | <b>216.3 ± 29.7</b>  | <b>220.7 ± 15.4</b>  | <b>219.9 ± 22.0</b>  |
| # assays                           | 5                    | 5                    | 5                    | 5                    | 5                    | 5                    | 5                    | 5                    |
| p value                            |                      |                      | p>0.9999             | 0.69                 |                      |                      |                      |                      |
| NF10 <sup><i>mdr1</i>-YF-1</sup>   |                      |                      |                      |                      | 0.0079               | 0.10                 | 0.0079               | 0.02                 |
| NF10 <sup><i>mdr1</i>-YY-1</sup>   |                      |                      |                      | 0.42                 | 0.0079               | 0.10                 | 0.0079               | 0.0079               |
| NF10 <sup><i>mdr1</i>-YY-2</sup>   |                      |                      |                      |                      | 0.02                 | 0.15                 | 0.02                 | 0.03                 |
| NF10 <sup><i>mdr1</i>-NF-1</sup>   |                      |                      |                      |                      |                      | 0.69                 | 0.31                 | 0.42                 |
| NF10 <sup><i>mdr1</i>-NF-2</sup>   |                      |                      |                      |                      |                      |                      | 0.31                 | 0.84                 |
| NF10 <sup><i>mdr1</i>-NY-1</sup>   |                      |                      |                      |                      |                      |                      |                      | 0.55                 |

IC<sub>90</sub> values (expressed as mean ± SEM). (LMF) lumefantrine, (MFQ) mefloquine, (DHA) dihydroartemisinin, (PPQ) piperazine, (CQ) chloroquine, (md-CQ) monodesethyl-chloroquine, (md-ADQ) monodesethyl-amodiaquine and (QN) quinine.

Statistical comparisons made using Mann–Whitney U test.

Color code:

|                 |        |        |         |
|-----------------|--------|--------|---------|
| not significant | p<0.05 | p<0.01 | p<0.001 |
|-----------------|--------|--------|---------|

Supplementary Table 6 (page 1 of 2) | Mean±SEM IC<sub>90</sub> values (nM) of KC5 parental strain and *pfmdr1*-modified recombinant lines.

| Line                            | KC5 (YF)          | KC5 <sup><i>mdr1</i>-YF-1</sup> | KC5 <sup><i>mdr1</i>-YY-1</sup> | KC5 <sup><i>mdr1</i>-NF-1</sup> | KC5 <sup><i>mdr1</i>-NF-2</sup> | KC5 <sup><i>mdr1</i>-NY-1</sup> | KC5 <sup><i>mdr1</i>-NY-2</sup> |
|---------------------------------|-------------------|---------------------------------|---------------------------------|---------------------------------|---------------------------------|---------------------------------|---------------------------------|
| <b>LMF IC<sub>90</sub> (nM)</b> | <b>3.0 ± 0.5</b>  | <b>2.9 ± 0.2</b>                | <b>2.8 ± 0.2</b>                | <b>11.1 ± 1.4</b>               | <b>10.6 ± 0.8</b>               | <b>10.3 ± 0.6</b>               | <b>12.1 ± 0.6</b>               |
| # assays                        | 8                 | 10                              | 10                              | 10                              | 8                               | 10                              | 8                               |
| p value                         |                   |                                 | 0.74                            | 0.0001                          | <0.0001                         | <0.0001                         | <0.0001                         |
| KC5 <sup><i>mdr1</i>-YF-1</sup> |                   |                                 |                                 | <0.0001                         | <0.0001                         | <0.0001                         | <0.0001                         |
| KC5 <sup><i>mdr1</i>-YY-1</sup> |                   |                                 |                                 |                                 | 0.83                            | 0.74                            | 0.46                            |
| KC5 <sup><i>mdr1</i>-NF-1</sup> |                   |                                 |                                 |                                 |                                 | 0.63                            | 0.23                            |
| KC5 <sup><i>mdr1</i>-NF-2</sup> |                   |                                 |                                 |                                 |                                 |                                 | 0.02                            |
| KC5 <sup><i>mdr1</i>-NY-1</sup> |                   |                                 |                                 |                                 |                                 |                                 |                                 |
| <b>MFQ IC<sub>90</sub> (nM)</b> | <b>9.2 ± 1.1</b>  | <b>9.4 ± 0.5</b>                | <b>9.0 ± 0.4</b>                | <b>27.1 ± 2.2</b>               | <b>25.1 ± 1.2</b>               | <b>26.0 ± 1.2</b>               | <b>28.8 ± 1.8</b>               |
| # assays                        | 8                 | 9                               | 10                              | 9                               | 7                               | 9                               | 7                               |
| p value                         |                   |                                 | 0.66                            | <0.0001                         | 0.0002                          | <0.0001                         | 0.0002                          |
| KC5 <sup><i>mdr1</i>-YF-1</sup> |                   |                                 |                                 | <0.0001                         | 0.0001                          | <0.0001                         | 0.0001                          |
| KC5 <sup><i>mdr1</i>-YY-1</sup> |                   |                                 |                                 |                                 | 0.84                            | 0.86                            | 0.35                            |
| KC5 <sup><i>mdr1</i>-NF-1</sup> |                   |                                 |                                 |                                 |                                 | 0.54                            | 0.10                            |
| KC5 <sup><i>mdr1</i>-NF-2</sup> |                   |                                 |                                 |                                 |                                 |                                 | 0.30                            |
| KC5 <sup><i>mdr1</i>-NY-1</sup> |                   |                                 |                                 |                                 |                                 |                                 |                                 |
| <b>DHA IC<sub>90</sub> (nM)</b> | <b>1.3 ± 0.1</b>  | <b>1.6 ± 0.2</b>                | <b>1.4 ± 0.1</b>                | <b>1.7 ± 0.2</b>                | <b>2.0 ± 0.2</b>                | <b>2.3 ± 0.2</b>                | <b>2.3 ± 0.2</b>                |
| # assays                        | 8                 | 9                               | 9                               | 8                               | 8                               | 9                               | 7                               |
| p value                         |                   |                                 | 0.54                            | 0.54                            | 0.07                            | 0.0056                          | 0.0052                          |
| KC5 <sup><i>mdr1</i>-YF-1</sup> |                   |                                 |                                 | 0.16                            | 0.01                            | 0.0011                          | 0.0010                          |
| KC5 <sup><i>mdr1</i>-YY-1</sup> |                   |                                 |                                 |                                 | 0.44                            | 0.01                            | 0.05                            |
| KC5 <sup><i>mdr1</i>-NF-1</sup> |                   |                                 |                                 |                                 |                                 | 0.11                            | 0.23                            |
| KC5 <sup><i>mdr1</i>-NF-2</sup> |                   |                                 |                                 |                                 |                                 |                                 | p>0.9999                        |
| KC5 <sup><i>mdr1</i>-NY-1</sup> |                   |                                 |                                 |                                 |                                 |                                 |                                 |
| <b>PPQ IC<sub>90</sub> (nM)</b> | <b>56.3 ± 5.0</b> | <b>68.6 ± 9.0</b>               | <b>62.2 ± 5.5</b>               | <b>51.2 ± 4.5</b>               | <b>52.3 ± 3.8</b>               | <b>52.7 ± 3.9</b>               | <b>55.2 ± 1.5</b>               |
| # assays                        | 8                 | 8                               | 8                               | 8                               | 7                               | 8                               | 7                               |
| p value                         |                   |                                 | 0.96                            | 0.38                            | 0.07                            | 0.28                            | 0.19                            |
| KC5 <sup><i>mdr1</i>-YF-1</sup> |                   |                                 |                                 | 0.13                            | 0.07                            | 0.04                            | 0.19                            |
| KC5 <sup><i>mdr1</i>-YY-1</sup> |                   |                                 |                                 |                                 | 0.54                            | p>0.9999                        | 0.96                            |
| KC5 <sup><i>mdr1</i>-NF-1</sup> |                   |                                 |                                 |                                 |                                 | 0.19                            | p>0.9999                        |
| KC5 <sup><i>mdr1</i>-NF-2</sup> |                   |                                 |                                 |                                 |                                 |                                 | 0.46                            |
| KC5 <sup><i>mdr1</i>-NY-1</sup> |                   |                                 |                                 |                                 |                                 |                                 |                                 |

**Supplementary Table 6 (page 2 of 2) | Mean±SEM IC<sub>90</sub> values (nM) of KC5 parental strain and *pfmdr1*-modified recombinant lines.**

|                                    |                       |                      |                       |                       |                       |                       |                       |
|------------------------------------|-----------------------|----------------------|-----------------------|-----------------------|-----------------------|-----------------------|-----------------------|
| <b>CQ IC<sub>90</sub> (nM)</b>     | <b>368.2 ± 45.2</b>   | <b>258.3 ± 18.2</b>  | <b>263.6 ± 26.1</b>   | <b>300.1 ± 45.1</b>   | <b>223.5 ± 22.1</b>   | <b>194.8 ± 16.4</b>   | <b>218.5 ± 22.5</b>   |
| # assays                           | 6                     | 6                    | 6                     | 6                     | 6                     | 6                     | 6                     |
| p value                            |                       |                      | 0.82                  | 0.59                  | 0.70                  | 0.02                  | 0.09                  |
| KC5 <sup><i>mdr1</i>-YF-1</sup>    |                       |                      |                       |                       |                       |                       |                       |
| KC5 <sup><i>mdr1</i>-YY-1</sup>    |                       |                      |                       | 0.49                  | 0.82                  | 0.03                  | 0.18                  |
| KC5 <sup><i>mdr1</i>-NF-1</sup>    |                       |                      |                       |                       | 0.13                  | 0.09                  | 0.24                  |
| KC5 <sup><i>mdr1</i>-NF-2</sup>    |                       |                      |                       |                       |                       | 0.24                  | 0.70                  |
| KC5 <sup><i>mdr1</i>-NY-1</sup>    |                       |                      |                       |                       |                       |                       | 0.49                  |
| <b>md-CQ IC<sub>90</sub> (nM)</b>  | <b>1598.3 ± 102.3</b> | <b>1476.4 ± 98.9</b> | <b>1513.0 ± 109.7</b> | <b>1586.7 ± 139.9</b> | <b>1449.7 ± 113.0</b> | <b>1277.7 ± 125.9</b> | <b>1427.7 ± 106.2</b> |
| # assays                           | 7                     | 9                    | 8                     | 8                     | 8                     | 9                     | 8                     |
| p value                            |                       |                      | 0.89                  | 0.48                  | 0.82                  | 0.30                  | 0.82                  |
| KC5 <sup><i>mdr1</i>-YF-1</sup>    |                       |                      |                       |                       |                       |                       |                       |
| KC5 <sup><i>mdr1</i>-YY-1</sup>    |                       |                      |                       | 0.44                  | 0.72                  | 0.14                  | 0.44                  |
| KC5 <sup><i>mdr1</i>-NF-1</sup>    |                       |                      |                       |                       | 0.38                  | 0.17                  | 0.33                  |
| KC5 <sup><i>mdr1</i>-NF-2</sup>    |                       |                      |                       |                       |                       | 0.37                  | 0.96                  |
| KC5 <sup><i>mdr1</i>-NY-1</sup>    |                       |                      |                       |                       |                       |                       | 0.37                  |
| <b>md-ADQ IC<sub>90</sub> (nM)</b> | <b>235.0 ± 2.3</b>    | <b>210.4 ± 9.0</b>   | <b>212.9 ± 9.3</b>    | <b>163.9 ± 12.3</b>   | <b>140.4 ± 11.6</b>   | <b>138.2 ± 11.6</b>   | <b>138.0 ± 13.0</b>   |
| # assays                           | 8                     | 8                    | 8                     | 8                     | 8                     | 8                     | 8                     |
| p value                            |                       |                      | p>0.9999              | 0.01                  | 0.0019                | 0.0019                | 0.0019                |
| KC5 <sup><i>mdr1</i>-YF-1</sup>    |                       |                      |                       |                       |                       |                       |                       |
| KC5 <sup><i>mdr1</i>-YY-1</sup>    |                       |                      |                       | 0.01                  | 0.0011                | 0.0019                | 0.0019                |
| KC5 <sup><i>mdr1</i>-NF-1</sup>    |                       |                      |                       |                       | 0.16                  | 0.28                  | 0.19                  |
| KC5 <sup><i>mdr1</i>-NF-2</sup>    |                       |                      |                       |                       |                       | 0.65                  | 0.65                  |
| KC5 <sup><i>mdr1</i>-NY-1</sup>    |                       |                      |                       |                       |                       |                       | 0.80                  |
| <b>QN IC<sub>90</sub> (nM)</b>     | <b>194.9 ± 34.8</b>   | <b>131.6 ± 15.3</b>  | <b>147.4 ± 15.9</b>   | <b>267.3 ± 69.1</b>   | <b>192.2 ± 44.8</b>   | <b>153.2 ± 33.9</b>   | <b>210.5 ± 45.9</b>   |
| # assays                           | 7                     | 8                    | 8                     | 7                     | 8                     | 9                     | 8                     |
| p value                            |                       |                      | 0.65                  | 0.05                  | 0.80                  | 0.54                  | p>0.9999              |
| KC5 <sup><i>mdr1</i>-YF-1</sup>    |                       |                      |                       |                       |                       |                       |                       |
| KC5 <sup><i>mdr1</i>-YY-1</sup>    |                       |                      |                       | 0.15                  | p>0.9999              | 0.24                  | 0.96                  |
| KC5 <sup><i>mdr1</i>-NF-1</sup>    |                       |                      |                       |                       | 0.40                  | 0.17                  | 0.69                  |
| KC5 <sup><i>mdr1</i>-NF-2</sup>    |                       |                      |                       |                       |                       | 0.48                  | 0.96                  |
| KC5 <sup><i>mdr1</i>-NY-1</sup>    |                       |                      |                       |                       |                       |                       | 0.48                  |

IC<sub>90</sub> values (expressed as mean ± SEM). (LMF) lumefantrine, (MFQ) mefloquine, (DHA) dihydroartemisinin, (PPQ) piperazine, (CQ) chloroquine, (md-CQ) monodesethyl-chloroquine, (md-ADQ) monodesethyl-amodiaquine and (QN) quinine.

Statistical comparisons made using Mann–Whitney U test.

Color code:

|                 |        |        |         |
|-----------------|--------|--------|---------|
| not significant | p<0.05 | p<0.01 | p<0.001 |
|-----------------|--------|--------|---------|



**Supplementary Table 7 | Mean±SEM IC<sub>50</sub> values of K1 parental strain and PfMDR1 F1226Y recombinant lines.**

| <b>Line</b>                        | <b>K1 (SNFD)</b>    | <b>K1<sup>mdr1</sup>-SNFD</b> | <b>K1<sup>mdr1</sup>-SNYD-1</b> | <b>K1<sup>mdr1</sup>-SNYD-2</b> |
|------------------------------------|---------------------|-------------------------------|---------------------------------|---------------------------------|
| <b>LMF IC<sub>50</sub> (nM)</b>    | <b>2.6 ± 1.1</b>    | <b>1.8 ± 0.6</b>              | <b>1.5 ± 0.6</b>                | <b>2.0 ± 0.6</b>                |
| # assays                           | 3                   | 3                             | 3                               | 3                               |
| p value                            |                     |                               |                                 |                                 |
| K1 (SNFD)                          |                     | 0.70                          | 0.40                            | 0.90                            |
| K1 <sup>mdr1</sup> -SNFD           |                     |                               | 0.70                            | 0.90                            |
| K1 <sup>mdr1</sup> -SNYD-1         |                     |                               |                                 | 0.40                            |
| <b>MFQ IC<sub>50</sub> (nM)</b>    | <b>10.1 ± 1.4</b>   | <b>9.4 ± 0.9</b>              | <b>7.3 ± 1.2</b>                | <b>8.8 ± 0.7</b>                |
| # assays                           | 4                   | 4                             | 4                               | 4                               |
| p value                            |                     |                               |                                 |                                 |
| K1 (SNFD)                          |                     | p>0.9999                      | 0.20                            | 0.66                            |
| K1 <sup>mdr1</sup> -SNFD           |                     |                               | 0.20                            | 0.66                            |
| K1 <sup>mdr1</sup> -SNYD-1         |                     |                               |                                 | 0.20                            |
| <b>ART IC<sub>50</sub> (nM)</b>    | <b>2.7 ± 0.3</b>    | <b>2.4 ± 0.4</b>              | <b>2.1 ± 0.2</b>                | <b>2.3 ± 0.3</b>                |
| # assays                           | 4                   | 4                             | 4                               | 4                               |
| p value                            |                     |                               |                                 |                                 |
| K1 (SNFD)                          |                     | 0.66                          | 0.20                            | 0.34                            |
| K1 <sup>mdr1</sup> -SNFD           |                     |                               | p>0.9999                        | p>0.9999                        |
| K1 <sup>mdr1</sup> -SNYD-1         |                     |                               |                                 | 0.66                            |
| <b>AS IC<sub>50</sub> (nM)</b>     | <b>1.9 ± 0.3</b>    | <b>1.7 ± 0.2</b>              | <b>1.4 ± 0.2</b>                | <b>1.7 ± 0.2</b>                |
| # assays                           | 4                   | 4                             | 4                               | 4                               |
| p value                            |                     |                               |                                 |                                 |
| K1 (SNFD)                          |                     | 0.83                          | 0.20                            | 0.66                            |
| K1 <sup>mdr1</sup> -SNFD           |                     |                               | 0.49                            | 0.83                            |
| K1 <sup>mdr1</sup> -SNYD-1         |                     |                               |                                 | 0.34                            |
| <b>PPQ IC<sub>50</sub> (nM)</b>    | <b>16.1 ± 1.7</b>   | <b>18.7 ± 1.9</b>             | <b>15.8 ± 1.6</b>               | <b>17.0 ± 1.7</b>               |
| # assays                           | 4                   | 4                             | 4                               | 4                               |
| p value                            |                     |                               |                                 |                                 |
| K1 (SNFD)                          |                     | 0.49                          | p>0.9999                        | 0.83                            |
| K1 <sup>mdr1</sup> -SNFD           |                     |                               | 0.20                            | 0.66                            |
| K1 <sup>mdr1</sup> -SNYD-1         |                     |                               |                                 | 0.66                            |
| <b>CQ IC<sub>50</sub> (nM)</b>     | <b>278.3 ± 23.7</b> | <b>312.8 ± 31.2</b>           | <b>269.6 ± 29.6</b>             | <b>292.1 ± 25.4</b>             |
| # assays                           | 4                   | 4                             | 4                               | 4                               |
| p value                            |                     |                               |                                 |                                 |
| K1 (SNFD)                          |                     | 0.66                          | 0.66                            | 0.49                            |
| K1 <sup>mdr1</sup> -SNFD           |                     |                               | 0.49                            | 0.66                            |
| K1 <sup>mdr1</sup> -SNYD-1         |                     |                               |                                 | 0.34                            |
| <b>md-ADQ IC<sub>50</sub> (nM)</b> | <b>70.2 ± 4.5</b>   | <b>81.6 ± 7.1</b>             | <b>79.4 ± 6.9</b>               | <b>83.8 ± 5.6</b>               |
| # assays                           | 4                   | 4                             | 4                               | 4                               |
| p value                            |                     |                               |                                 |                                 |
| K1 (SNFD)                          |                     | 0.34                          | 0.34                            | 0.20                            |
| K1 <sup>mdr1</sup> -SNFD           |                     |                               | 0.83                            | p>0.9999                        |
| K1 <sup>mdr1</sup> -SNYD-1         |                     |                               |                                 | 0.49                            |
| <b>QN IC<sub>50</sub> (nM)</b>     | <b>125.5 ± 21.4</b> | <b>115.8 ± 26.8</b>           | <b>130.6 ± 25.0</b>             | <b>124.4 ± 25.1</b>             |
| # assays                           | 4                   | 4                             | 4                               | 4                               |
| p value                            |                     |                               |                                 |                                 |
| K1 (SNFD)                          |                     | p>0.9999                      | p>0.9999                        | p>0.9999                        |
| K1 <sup>mdr1</sup> -SNFD           |                     |                               | 0.66                            | 0.66                            |
| K1 <sup>mdr1</sup> -SNYD-1         |                     |                               |                                 | 0.66                            |

IC<sub>50</sub> values (expressed as mean ± SEM). (LMF) lumefantrine; (MFQ) mefloquine; (ART) artemisinin; (AS) artesunate; (PPQ) piperazine; (CQ) chloroquine; (md-ADQ) monodesethyl-amodiaquine; (QN) quinine. (SNFD) K1 PfMDR1 haplotype at positions 1034, 1042, 1226, 1246 respectively. Statistical comparisons were made using Mann–Whitney *U* test.

**Supplementary Table 8 | List of oligonucleotides used in this study.**

| <b>Primer Name</b> | <b>Description</b>                                                                               |     | <b>Primer sequence (5'-3')</b>                       |
|--------------------|--------------------------------------------------------------------------------------------------|-----|------------------------------------------------------|
| p1                 | 529 bp upstream of <i>pfmdr1</i> start codon; tailed with BstAPI restriction site (underlined)   | Fwd | gtAgcataTggtgCATGGATATAGAAAGAAAAATGGAAG              |
| p2                 | 1775 bp downstream of <i>pfmdr1</i> start codon; tailed with AatII restriction site (underlined) | Rev | gTTGacgTcTGACTAAATACTCAGATTTATTATCTAAAG              |
| p3                 | 627 bp upstream of <i>pfmdr1</i> start codon                                                     | Fwd | CATTTTTACTGATTCCTTTAAAAGGC                           |
| p4                 | 709 bp downstream of <i>pfmdr1</i> start codon                                                   | Rev | CCTCTTCTATAATGGACATGGTATTG                           |
| p5                 | 3217 bp downstream of <i>pfmdr1</i> start codon                                                  | Fwd | ACTGGTAGTTATGCTGGAAAATTA                             |
| p6                 | Anneals at the start of the <i>P. yoelii</i> <i>mdr1</i> 3' UTR                                  | Rev | TTATCTGGTTATGTATCTGCTCA                              |
| p7                 | 1758 bp downstream of <i>pfmdr1</i> start codon                                                  | Fwd | TGATGAAGCTACATCTTCTTTAG                              |
| p8                 | Anneals downstream of <i>pfmdr1</i>                                                              | Rev | ACGGACAAGAGTTGATACTGTTCAT                            |
| p9                 | SDM primer for engineering 3 silent mutations (small letters) under the ZFN binding site         | Fwd | GTAACtTgAGTATCAAAGAgGAGGTTGAAAAAGAGTTGAAC            |
| p10                | SDM primer for engineering 3 silent mutations (small letters) under the ZFN binding site         | Rev | CTCcTCTTTGATACTcAaGTTACCATCTTTTTTCTCTTTCTG           |
| p11                | SDM primer for engineering Y86 (small letter) in <i>pfmdr1</i>                                   | Fwd | GTTTGGTGTAAATATTAAAGtACATGTATTTAGGTGATGATATTAATCC    |
| p12                | SDM primer for engineering Y86 (small letter) in <i>pfmdr1</i>                                   | Rev | GGATTAATATCATCACCTAAATACATGTaCTTTAATATTACACCAAAC     |
| p13                | SDM primer for engineering F184 (small letter) in <i>pfmdr1</i>                                  | Fwd | CCAGTTCCTTTTTAGGTTTATaTATTTGGTCATTAATAAAAAATG        |
| p14                | SDM primer for engineering F184 (small letter) in <i>pfmdr1</i>                                  | Rev | CATTTTTTTATTAATGACCAAATaATAAACCTAAAAAGGAACTGG        |
| p15                | SDM primer for engineering F1226Y (small letter) in <i>pfmdr1</i>                                | Fwd | GGATCTGCAGAAGATTATACTGTATaTAATAATAATGGAGAAATATTATTAG |
| p16                | SDM primer for engineering F1226Y (small letter) in <i>pfmdr1</i>                                | Rev | CTAATAATATTTCTCCATTATTATTAaTACAGTATAATCTTCTGCAGATCC  |
| p17                | Anneals in <i>pfmdr1</i> 5' UTR                                                                  | Fwd | CAAATAAATAAATACGTATGTGAGC                            |
| p18                | 2619 bp downstream of <i>pfmdr1</i> start codon                                                  | Rev | TGATCAAAGAAACTCATTTCTTGA                             |

SDM: site directed mutagenesis; ZFN: zinc finger nucleases
